# Supplementary material
Source: Springer Nature journal article supplement (https://www.springermedizin.de/resource/supplementary/12985_2008_420_MOESM2_ESM.pdf/9608042)
Supplement: MOESM2 [file 9608042]

**Selection results for logistic regression models used to describe variation in rRT-PCR prevalence among age and sex classifications.**

| Model Structure <sup>a</sup> | # parameters <sup>a</sup> | AIC <sup>b</sup> | $\Delta$ AIC <sup>c</sup> | AIC weight <sup>d</sup> |
|------------------------------|---------------------------|------------------|---------------------------|-------------------------|
| Sex, age sex*age             | 4                         | 1795.3           | 0                         | 0.675                   |
| Sex, age                     | 3                         | 1797.4           | 2.1                       | 0.245                   |
| Age                          | 2                         | 1799.6           | 4.3                       | 0.079                   |
| Sex                          | 2                         | 1945.9           | 150.6                     | <0.001                  |
| Constant                     | 1                         | 1948.9           | 153.6                     | <0.001                  |

- a. n=10,241.
- b. Number of parameters in each model.
- c. Akaike's Information Criterion value.
- d. Difference in AIC value for each model relative to the lowest AIC for each species.  $\Delta$  AIC = 0 indicates the most parsimonious model for each species.
- e. Weight of evidence that a model represents the true best model considered.
